# Supplementary material for: Unimodal relationship between small-scale barnacle recruitment and the density of pre-existing barnacle adults
Source: PeerJ. 2017 Jun 6;5:e3444. doi: 10.7717/peerj.3444 (PMC5463980; doi:10.7717/peerj.3444)
Supplement: Data S1 — Full dataset used to make this paper [file peerj-05-3444-s001.xls]

## Sheet: Data
2007 - Adult density (individuals per dm2)	2007 - % cover of bare substrate	2007 - Recruit density (individuals per dm2 of bare substrate)	2008 - Adult density (individuals per dm2)	2008 - % cover of bare substrate	2008 - Recruit density (individuals per dm2 of bare substrate)	2009 - Adult density (individuals per dm2)	2009 - % cover of bare substrate	2009 - Recruit density (individuals per dm2 of bare substrate)
0	100	775	0	100	356	0	100	175
0	100	685	0	100	65	0	100	453
0	100	263	0	100	294	0	100	1126
0	100	974	1	99.5	165.829	0	100	692
0	100	880	17	96	301.042	0	100	585
0	100	729	19	96	320.833	1	99.5	1176.88
0	100	1059	20	93	590.323	1	99.5	927.638
0	100	1209	22	92	297.826	1	99.5	989.95
0	100	829	23	91	368.132	1	99.5	822.111
0	100	772	25	92	532.609	2	99.5	846.231
1	99.5	730.653	26	92	329.348	2	99.5	321.608
2	99.5	1081.41	27	91	324.176	2	99.5	731.658
2	99.5	791.96	34	89	335.955	2	99	659.596
2	99.5	1349.75	41	86	509.302	3	99	1010.1
3	99	818.182	41	90	466.667	3	99	904.04
3	99	1028.28	48	88	830.682	3	99.5	627.136
3	99	1109.09	40	89	460.674	3	99.5	882.412
3	99	1112.12	48	83	439.759	3	99	896.97
4	99	1098.99	52	88	405.682	3	99	710.101
4	99	983.838	55	86	510.465	4	99	1069.7
6	98	893.878	64	81	481.481	4	99	814.141
8	97	1107.22	67	85	435.294	5	98	1107.14
8	96	1092.71	94	72	562.5	6	98	928.571
10	96	1265.62	96	75	440	6	98	1001.02
14	95	1487.37	98	73	658.904	6	97	990.722
16	94	956.383	109	78	534.615	7	97	943.299
18	92	1289.13	116	74	531.081	9	97	861.856
19	94	1192.55	128	63	322.222	10	96	895.833
21	92	916.304	129	70	604.286	13	95	1105.26
46	86	1377.91				16	94	1359.57
						20	93	797.849
						38	86	1287.21
